# Supplementary material
Source: MDPI journal article supplement (https://www.mdpi.com/2073-4441/15/13/2442)
Supplement: s1 [file s1]

## Supplementary Material

**Table S1.** Univariable nonlinear regression coefficients estimated without the weight function and the corresponding information criterion.

|                   | Alpha    | gamma            | beta1    | beta2    | beta3    | beta4    | AIC      | AICc     | BIC      | CAIC     | RMSE     | Ordinary | Adjusted |
|-------------------|----------|------------------|----------|----------|----------|----------|----------|----------|----------|----------|----------|----------|----------|
| Logistic          | 113445   | 30.276132        | 4.28E-05 |          |          |          | 3023.249 | 3023.427 | 3032.053 | 3035.053 | 12512.4  | 0.744838 | 0.74298  |
|                   | 88877.33 | <b>126.02203</b> |          | 0.002567 |          |          | 3080.693 | 3080.871 | 3089.497 | 3092.497 | 15384.4  | 0.614259 | 0.61144  |
|                   | 89287.81 | <b>106.89921</b> |          |          | 0.008454 |          | 3097.374 | 3097.552 | 3106.177 | 3109.177 | 16335.76 | 0.565076 | 0.55868  |
|                   | 133667.5 | 47.308796        |          |          |          | 0.004533 | 2955.681 | 2955.858 | 2964.484 | 2967.484 | 9776.73  | 0.844216 | 0.84308  |
| Gompertz          | 126728.5 | 3.9927719        | 2.01E-05 |          |          |          | 3016.859 | 3017.036 | 3025.662 | 3028.662 | 12228.06 | 0.756303 | 0.75452  |
|                   | 93528    | 9.2704796        |          | 0.001343 |          |          | 3086.569 | 3086.747 | 3095.372 | 3098.372 | 15713.02 | 0.597604 | 0.59467  |
|                   | 90704.24 | 8.1420232        |          |          | 0.004501 |          | 3102.76  | 3102.938 | 3111.563 | 3114.563 | 16594.44 | 0.551193 | 0.54792  |
|                   | 147546.8 | 4.8720879        |          |          |          | 0.002137 | 2956.971 | 2957.148 | 2965.774 | 2968.774 | 9858.244 | 0.841608 | 0.84045  |
| Chapman-Richards  | 183491.1 | 1.3625123        | 6.59E-06 |          |          |          | 3013.466 | 3013.644 | 3022.27  | 3025.27  | 12079.74 | 0.762179 | 0.76044  |
|                   | 92754.94 | 8.451908         |          | 0.001335 |          |          | 3087.763 | 3087.941 | 3096.566 | 3099.566 | 15780.64 | 0.594133 | 0.59117  |
|                   | 90640.45 | 6.2761634        |          |          | 0.004151 |          | 3102.711 | 3102.889 | 3111.514 | 3114.514 | 16652.4  | 0.548052 | 0.54475  |
|                   | 161035.8 | 2.5840282        |          |          |          | 0.001458 | 2964.968 | 2965.146 | 2973.772 | 2976.772 | 10145.97 | 0.832227 | 0.831    |
| Weibull           | 170492.2 | <b>2.207E-07</b> | 1.272214 |          |          |          | 3013.632 | 3013.809 | 3022.435 | 3025.435 | 12086.94 | 0.761896 | 0.76016  |
|                   | 89193.93 | 7.941E-12        |          | 3.34349  |          |          | 3082.459 | 3082.637 | 3091.263 | 3094.263 | 15482.43 | 0.609327 | 0.60933  |
|                   | 85945.33 | 1.559E-09        |          |          | 3.171833 |          | 3098.169 | 3098.346 | 3106.972 | 3109.972 | 16382.52 | 0.562583 | 0.56258  |
|                   | 136964.4 | <b>5.273E-07</b> |          |          |          | 2.086343 | 2959.68  | 2959.858 | 2968.484 | 2971.484 | 9954.804 | 0.83849  | 0.83731  |
| Modified logistic | 230047.7 | <b>6.986E-08</b> | 1.356326 |          |          |          | 3013.238 | 3013.416 | 3022.041 | 3025.041 | 12069.83 | 0.762569 | 0.76084  |
|                   | 110959.9 | 3.462E-11        |          | 3.134637 |          |          | 3088.627 | 3088.804 | 3097.43  | 3100.43  | 15829.75 | 0.591603 | 0.5916   |
|                   | 96509.45 | 7.138E-10        |          |          | 3.322003 |          | 3102.251 | 3102.429 | 3111.055 | 3114.055 | 16624.89 | 0.549544 | 0.54954  |

|           |          |                  |          |          |          |          |          |          |          |          |          |          |         |
|-----------|----------|------------------|----------|----------|----------|----------|----------|----------|----------|----------|----------|----------|---------|
|           | 176622.1 | <b>3.163E-07</b> |          |          |          | 2.144988 | 2964.087 | 2964.265 | 2972.89  | 2975.89  | 10113.86 | 0.833287 | 0.83207 |
| Lundqvist | 1966089  | 75.817467        | 0.270111 |          |          |          | 3013.942 | 3014.12  | 3022.745 | 3025.745 | 12100.43 | 0.761364 | 0.75962 |
|           | 109033.3 | 1718048          |          | 1.921635 |          |          | 3091.985 | 3092.163 | 3100.788 | 3103.788 | 16022.13 | 0.581616 | 0.57856 |
|           | 113268.3 | <b>17414.702</b> |          |          | 1.563732 |          | 3105.634 | 3105.811 | 3114.437 | 3117.437 | 16828.39 | 0.538449 | 0.53166 |
|           | 460940.3 | 123.67662        |          |          |          | 0.614541 | 2972.016 | 2972.194 | 2980.82  | 2983.82  | 10406.49 | 0.823501 | 0.82221 |

Note: The bold font denotes that the  $p$  value of the two-sided t test for the indicated estimated coefficient was larger than the selected significance level (0.05).

**Table S2.** Multivariable nonlinear regression coefficients estimated with different weight functions and the corresponding information criterion.

|                   | Weight Function | alpha       | gamma              | beta1        | beta2               | beta3               | beta4       | AIC         | AICc        | BIC         | CAIC        | RMSE        | Ordinary    | Adjusted    |
|-------------------|-----------------|-------------|--------------------|--------------|---------------------|---------------------|-------------|-------------|-------------|-------------|-------------|-------------|-------------|-------------|
| Logistic          | None            | 135149.0823 | 37.49313349        | 1.26473E-05  | <b>0.000229046</b>  | <b>-0.001175575</b> | 0.003134057 | 2920.657048 | 2921.293412 | 2938.263892 | 2944.263892 | 8466.365593 | 0.883176904 | 0.879689647 |
|                   | Andrews         | 154936.6291 | 162.4585113        | -1.54232E-05 | 0.00087081          | 0.001396589         | 0.003603587 | 4529.521831 | 4530.158195 | 4547.128675 | 4553.128675 | 15254.30583 | 0.995009764 | 0.99489887  |
|                   | Bisquare        | 154971.8214 | 161.9912456        | -1.54119E-05 | 0.000885088         | 0.001346106         | 0.003598053 | 4529.721412 | 4530.357776 | 4547.328256 | 4553.328256 | 15254.56931 | 0.99491816  | 0.994805231 |
|                   | Cauchy          | 152698.0914 | 55.86846435        | 2.18135E-05  | <b>2.6666E-05</b>   | <b>-0.000739561</b> | 0.00277323  | 3200.691086 | 3201.327449 | 3218.297929 | 3224.297929 | 9516.295191 | 0.980893842 | 0.980323509 |
|                   | Fair            | 143821.4625 | 48.96545902        | 2.11873E-05  | <b>7.35522E-05</b>  | <b>-0.000900031</b> | 0.002723388 | 3068.913848 | 3069.550212 | 3086.520692 | 3092.520692 | 9018.784603 | 0.93881806  | 0.936991733 |
|                   | Huber           | 150267.3788 | 50.15566415        | 2.60797E-05  | <b>-0.000137128</b> | <b>-0.00056993</b>  | 0.002599345 | 3200.932967 | 3201.569331 | 3218.539811 | 3224.539811 | 9501.337992 | 0.968339913 | 0.967394836 |
|                   | Logistic        | 149039.6825 | 51.27849186        | 2.64607E-05  | <b>-0.000157799</b> | <b>-0.000515828</b> | 0.002632182 | 3171.909258 | 3172.545622 | 3189.516102 | 3195.516102 | 9481.968055 | 0.964296116 | 0.963230328 |
|                   | Talwar          | 155278.1435 | 155.0494226        | -1.50301E-05 | 0.000776505         | 0.001634023         | 0.003577631 | 4502.367969 | 4503.004333 | 4519.974813 | 4525.974813 | 15119.67789 | 0.994333436 | 0.994207513 |
|                   | Welsch          | 156260.4671 | 177.8471322        | -1.97264E-05 | 0.001820947         | -0.000975069        | 0.003394389 | 5060.627253 | 5061.263617 | 5078.234097 | 5084.234097 | 17075.19946 | 0.99511662  | 0.9950081   |
| Gompertz          | None            | 159914.4094 | 4.206218532        | 7.83438E-06  | <b>0.000162228</b>  | -0.000946206        | 0.001279879 | 2900.168018 | 2900.804381 | 2917.774861 | 2923.774861 | 7864.820991 | 0.89918797  | 0.896178655 |
|                   | Andrews         | 134614.4776 | 5.216220413        | 3.29443E-06  | <b>2.75148E-05</b>  | 0.00048653          | 0.001641139 | 3376.754358 | 3377.390721 | 3394.361201 | 3400.361201 | 8988.283831 | 0.992238073 | 0.992006374 |
|                   | Bisquare        | 134496.2043 | 5.212324719        | 3.31918E-06  | <b>2.65195E-05</b>  | 0.000489489         | 0.001638736 | 3377.130191 | 3377.766554 | 3394.737034 | 3400.737034 | 8988.158212 | 0.992035958 | 0.991798225 |
|                   | Cauchy          | 126450.6488 | 4.906275079        | 6.47532E-06  | <b>-2.23524E-05</b> | 0.000538446         | 0.001298123 | 3368.581116 | 3369.217479 | 3386.187959 | 3392.187959 | 9100.238315 | 0.989395832 | 0.98907929  |
|                   | Fair            | 181053.7753 | 4.603343702        | 7.36103E-06  | 0.000107843         | -0.000441295        | 0.000990585 | 3094.174565 | 3094.810928 | 3111.781408 | 3117.781408 | 8179.879457 | 0.956490394 | 0.9551916   |
|                   | Huber           | 164048.8355 | 4.585447365        | 7.70745E-06  | <b>8.76776E-05</b>  | <b>-0.000300864</b> | 0.001016771 | 3156.799681 | 3157.436045 | 3174.406525 | 3180.406525 | 8245.787522 | 0.952198727 | 0.950771823 |
|                   | Logistic        | 163822.5194 | 4.611703951        | 7.66437E-06  | <b>8.65101E-05</b>  | <b>-0.000290103</b> | 0.001026399 | 3149.057534 | 3149.693897 | 3166.664377 | 3172.664377 | 8246.599428 | 0.954017788 | 0.952645184 |
|                   | Talwar          | 36584.91005 | 4.361486515        | 1.07077E-05  | <b>7.17029E-05</b>  | <b>0.000654642</b>  | 0.002774503 | 5919.178473 | 5919.814837 | 5936.785317 | 5942.785317 | 17922.94176 | 0.985259332 | 0.984819312 |
|                   | Welsch          | 124858.8388 | 5.047543104        | 5.67861E-06  | <b>-7.7946E-05</b>  | 0.000857776         | 0.001361292 | 3414.165621 | 3414.801985 | 3431.772465 | 3437.772465 | 9275.786993 | 0.994881284 | 0.994728487 |
| Modified logistic | None            | 1553121.081 | <b>1.09681E-06</b> | 35.20713389  | 1.525607723         | 15.53046189         | 1.626074654 | 2953.640558 | 2954.276922 | 2971.247402 | 2977.247402 | 9532.881622 | 0.851890445 | 0.849712363 |
|                   | Andrews         | 9947.589852 | <b>3.86884E-05</b> | 17.96107713  | 1.416005174         | 13878552.2          | 33.90500454 | 6918.796517 | 6919.432881 | 6936.403361 | 6942.403361 | 24845.92541 | 0.790847663 | 0.789321004 |
|                   | Bisquare        | 10035.3485  | <b>3.84538E-05</b> | 17.99240689  | 1.415413409         | 14369711.74         | 33.9775578  | 6914.672647 | 6915.30901  | 6932.27949  | 6938.27949  | 24834.59196 | 0.789280033 | 0.787741931 |

|  |          |             |                    |             |             |             |             |             |             |             |             |             |             |             |
|--|----------|-------------|--------------------|-------------|-------------|-------------|-------------|-------------|-------------|-------------|-------------|-------------|-------------|-------------|
|  | Cauchy   | 758073.1522 | <b>1.6969E-07</b>  | 18.40164637 | 1.559925486 | 845.3468053 | 28.55041094 | 5238.106724 | 5238.743087 | 5255.713567 | 5261.713567 | 19786.57731 | 0.965181195 | 0.964927043 |
|  | Fair     | 104887.9891 | 1.05629E-08        | 16.68499824 | 2.290129789 | 16682865.98 | 496228.6222 | 4292.342075 | 4292.978438 | 4309.948918 | 4315.948918 | 17359.09442 | 0.84663815  | 0.84663815  |
|  | Huber    | -1389387.05 | -3.19401E-07       | 20.67856054 | 1.416166753 | 6.783946023 | 33.91585436 | 4551.644453 | 4552.280817 | 4569.251297 | 4575.251297 | 18918.32211 | 0.762588819 | 0.760855891 |
|  | Logistic | 104150.5576 | 2.19892E-08        | 18.79019783 | 2.218912772 | 2.942157726 | 23.99673822 | 4314.005685 | 4314.642049 | 4331.612529 | 4337.612529 | 17330.0593  | 0.867930121 | 0.867930121 |
|  | Talwar   | 8531.740475 | <b>2.66348E-05</b> | 19.61500285 | 1.508567216 | 27959.71098 | 49.76627761 | 6984.631488 | 6985.267851 | 7002.238331 | 7008.238331 | 24970.06833 | 0.823637717 | 0.822350401 |
|  | Welsch   | 1484686.165 | <b>2.64022E-07</b> | 18.05412276 | 1.367469656 | 17090975.55 | 32.67678729 | 5805.32811  | 5805.964474 | 5822.934954 | 5828.934954 | 21655.18953 | 0.857689713 | 0.856650952 |

Note: The bold font denotes that the  $p$  value of the two-sided t test for the indicated estimated coefficient was larger than the selected significance level (0.05).

Figure S1. Main MATLAB code.

```

1  clc
2  close all
3  clear all
4  %% Exact basin
5  tic
6  % load('LiDAR_block.shp');
7
8  j = imread('DEMz1.tif');
9  load('FA.mat');
10 FA = FlowAccumulation;
11
12 FlowAccumulation = FlowAccumulation.^(1/2);
13 H0 = imread('DEMz1.tif');
14 H0 = double(H0);
15 [r3, c3] = size(H0);
16 H0 = reshape(H0, [], 1);
17 H0(H0<0) = 0;
18 H0 = reshape(H0, r3, c3);
19 ExcelName = 'Final Results sum Lvbo.xlsx'; % Save data as the Excel file
20 K = ones(1)./1;
21 Limit = 2;
22
23 levelNo = 15; % the number of basin area choice for research (max = 15)
24 % which accords to the number you selected in GIS
25 %
26
27 submax = 5; % the number of sub-basin area choice for research in the each
28 % above basin area (Recommendation 5)
29 %
30
31 iterationmax = 10; % the number of surface runoff area choice
32 % in each basin area (tried)
33 %
34
35
36
37
38 LineNo = 10; % the number of surface runoff line choice
39 % in each surface runoff area (tried)
40 %
41
42 % total largest number of Figures would be levelNo * iterationmax * LineNo
43 %
44
45 Posi = [208,117,1220,737];
46
47 Zsmooth1 = conv2(FlowAccumulation,K,'same'); % Convolution
48 % Nothing changes if K = 1;
49 FlowAccumulation = Zsmooth1;
50 % FlowAccumulation = Zsmooth1.^(1/2);
51 FlowAccFig = FlowAccumulation ;
52 H3 = imread('Penyu.tif');
53 H3 = double(H3);
54
55 [r3, c3] = size(H3);
56 H3 = reshape(H3, [], 1);
57 H3(H3<0) = 0;
58 % H1(H1>0) = 1;

```

```

59 H3 = reshape(H3,r3,c3);
60
61
62
63 Htpi = imread('myTPI.tif');
64 Htpi = double(Htpi);
65
66 [r3, c3] = size(Htpi);
67 r = r3;
68 c = c3;
69 Htpi = reshape(Htpi, [],1);
70 Htpi(Htpi<0) = 0;
71 Htpi = reshape(Htpi,r3,c3);
72
73 AreaMax = 2000;
74
75 %% Colormap set
76 cm = colormap('hot');
77 cm = flipud(cm);
78 colorhot = colormap('hot');
79 colorhot = rot90(colorhot,2);
80 %% Initial
81 maxi = max(H3,[], 'all');
82
83 level = [1 57 113 174 229 273 327 394 453 506 556 608 661 729 795 842];
84 % According to the number given by GIS
85
86 for i = 1:length(level)-1
87     H3(H3>level(i) & H3<=level(i+1)) = i;
88 end
89 H30 = H3;
90 t = 0;
91 FlowAccsub = zeros(r,c,70);
92 DEMsub = zeros(r,c,70);
93 TPIsub = zeros(r,c,70);
94 %% Preparation of Exact basin
95 for i = 1:levelNo
96
97     if i < 15
98         modification = 30;
99     else
100         modification = 1;
101     end
102     b = max(H3,[], 'all');
103     if b == 0
104         break
105     end
106     [rb0, cb0] = find(H3 == i);
107     % [rb, cb] = find(H3 == i);
108     FlowAccBasinArea = zeros(r3,c3);
109     FlowAccsubtraction = zeros(r3,c3);
110     for j = 1:length(rb0)
111         FlowAccBasinArea(rb0(j),cb0(j)) = FlowAccumulation(rb0(j),cb0(j));
112         FlowAccsubtraction(rb0(j),cb0(j)) = H3(rb0(j),cb0(j));
113     end
114
115     %% Basin Sub Area

```

```

116 sub = 0;
117 while size(rb0,1) > 10 && sub < 5
118     Lengthsave0 = zeros(1,iterationmax*LineNo);
119     sub = sub + 1;
120     row = rb0(1);
121     column = cb0(1);
122     No = 2000;
123     SubAreaId = zeros(No,2);
124     % TPIID = zeros(No,2);
125     for n = 1:No
126         if n == 1
127             x = [row, column];
128             y = FindContour(x,r,c);
129             SubArea = zeros(length(y),2);
130         else
131             x = SubAreaId;
132             y = FindContour(x,r,c);
133             SubArea = zeros(length(y),2);
134             old = SubAreaId;
135         end
136         k = 0;
137         for m = 1:length(y)
138             judge = H30(y(m,1),y(m,2));
139             if judge == i
140                 k = k + 1;
141                 SubArea(k,:) = y(m,:);
142             end
143         end
144         SubArea(SubArea==0) = [];
145         SubArea = reshape(SubArea,[],2);
146         if size(SubArea,1) > 0 || n == 1
147             if n == 1
148                 SubAreaId = [x;SubArea];
149             else
150                 SubAreaId = [SubAreaId;SubArea];
151                 SubAreaId = unique(SubAreaId,'rows');
152             end
153         else
154             break
155         end
156     end
157 end
158
159 %% Runoff Area
160 IDmin = min(SubAreaId,[],1);
161 IDmax = max(SubAreaId,[],1);
162 ID(sub,:) = [IDmin IDmax];
163 ExtractSub = zeros(r,c);
164 Hsub = zeros(r,c);
165 DEMsubeach = zeros(r,c); % to save each value of DEM
166
167
168
169
170
171
172

```

```

173 TPIsubeach = zeros(r,c); % to save each value of TPI
174 for l = 1:size(SubArea,1)
175     ExtractSub(SubArea(l,1),SubArea(l,2)) = ...
176     FlowAccBasinArea(SubArea(l,1),SubArea(l,2));
177     Hsub(SubArea(l,1),SubArea(l,2)) = ...
178     H3(SubArea(l,1),SubArea(l,2));
179     DEMsubeach(SubArea(l,1),SubArea(l,2)) = ...
180     H0(SubArea(l,1),SubArea(l,2));
181     TPIsubeach(SubArea(l,1),SubArea(l,2)) = ...
182     Htpi(SubArea(l,1),SubArea(l,2));
183
184 end
185 [rb, cb] = find(Hsub == i);
186 if size(rb,1) < 100 % Discard the area less than 100 girds
187     rb0(1) = [];
188     cb0(1) = [];
189     sub = sub -1;
190     continue
191 end
192 %% Save Flow Accumulation, TPI and DEM
193 FlowAccsave0 = sum(ExtractSub.^2,'all');
194 t = t + 1;
195 FlowAccsub(:,t) = ExtractSub;
196 DEMsub(:,t) = DEMsubeach;
197 TPIsub(:,t) = TPIsubeach;
198
199 Hplot = Hsub;
200 Hplot(Hplot>0) = modification;
201 Hplot = reshape(Hplot,r3,c3);
202 figure1 = figure(2);
203 colormap(spring);
204 axes1 = axes('Parent',figure1);
205 hold(axes1,'on');
206 hold on
207 ss1 = surf(axes1,H30,'Parent',axes1,'EdgeColor','none','FaceAlpha',0);
208 ss2 = surf(axes1,Hplot,'Parent',axes1,'EdgeColor','none');
209 hold off
210
211 xlim(axes1,[min(cb)-2 max(cb)+2]);
212 ylim(axes1,[min(rb)-2 max(rb)+2]);
213
214 grid(axes1,'on');
215 hold(axes1,'off');
216 % Set the remaining coordinate area properties
217 set(axes1,'Color','none','Colormap',cm,'DataAspectRatio',[1,1,0.5]);
218 view(axes1,[0 -90]);
219 cb1 = colorbar(axes1,'Position',...
220 [0.077 0.146862483311081 0.0229612109744559 0.671537516688922]);
221 cb1.Label.String = 'Level';
222 cb1.Label.FontSize = 12;
223 % Create axes
224 axes2 = axes('Parent',figure1);
225 hold(axes2,'on');
226 % Create surf
227 hold on
228 ss1 = surf(axes2,FlowAccumulation,'Parent',axes2,'EdgeColor','none','FaceAlpha',0);

```



```

229 ss2 = surf(axes2,ExtractSub,'Parent',axes2,'EdgeColor','none','FaceAlpha',0.8);
230 cb2 = colorbar(axes2,'Position',...
231 [0.93355737704918,0.146862483311081,0.022961210974456,0.671537516688921]);
232 cb2.Label.String = 'SQRT of Flow Accumulation';
233 cb2.Label.FontSize = 12;
234 hold off
235 xlim(axes2,[min(cb)-2 max(cb)+2]);
236 ylim(axes2,[min(rb)-2 max(rb)+2]);
237 zlim(axes2,[0 40]);
238 grid(axes2,'on');
239 hold(axes2,'off');
240 set(axes2,'Color','none','Colormap',colorhot,...
241 'DataAspectRatio',[1,1,0.5]); %,'XTick',[],'YTick',[]
242 view(axes2,[0 -90]);
243 set(figure1,'Position',Pos1);
244 print(['An example',num2str(i),'(' ,num2str(sub),')'],'-djpeg','-r600')
245 close all
246 FlowAccBasinArea = FlowAccBasinArea - ExtractSub;
247 H30 = H30 - Hsub;
248
249
250 Boundary = boundary(SubArea(:,1),SubArea(:,2),1);
251 polyin = polyshape([SubArea(Boundary,1)';SubArea(Boundary,2)']');
252 % plot(polyin)
253 % view([90 90]);
254 BoundaryCircumference = perimeter(polyin);
255 BoundaryCircumference = BoundaryCircumference.*2;
256 FindMaxLength = pdist2(SubArea(Boundary,:),SubArea(Boundary,:), 'euclidean');
257 MaxLength = max(FindMaxLength,[], 'all');
258
259 [xL, ~] = find(FindMaxLength == MaxLength);
260 MaxLength = MaxLength.*2;
261 if size(xL,1) == 0
262     continue
263 end
264
265
266
267 % Create figure
268 close all
269 figure1 = figure;
270
271 % Create axes
272 axes1 = axes('Parent',figure1);
273
274
275 % Create plot
276 plot(SubArea(:,1),SubArea(:,2),'Marker','.', 'LineStyle','none');
277 hold on
278 plot(SubArea(Boundary,1),SubArea(Boundary,2),'-m','LineWidth',1.8);
279 plot([SubArea(Boundary(xL(1)),1) SubArea(Boundary(xL(2)),1)],...
280 [SubArea(Boundary(xL(1)),2) SubArea(Boundary(xL(2)),2)], 'r-s',...
281 'LineWidth',4.5,'MarkerFaceColor','r','MarkerSize',8)
282 view(axes1,[90 90]);
283 box(axes1,'on');
284
285 % Set the remaining axes properties

```

```

286 set(axes1,'DataAspectRatio',[1 1 1],'PlotBoxAspectRatio',...
287 [76.0736196319018 60 1]);
288 set(figure1,'Position',[680,58,947,920]);
289
290 title([num2str(i),'(',num2str(sub),') Boundary Circumference = ',num2str(BoundaryCircumference),' m'];...
291 ['Max Length of Basin = ',num2str(MaxLength),' m'])
292 print(['An example',num2str(t),' Boundary'],'-djpeg','-r600')
293 close all
294
295 %% Save value
296 if i == 1 && sub == 1
297     S = size(SubArea,1)*2^2;
298     Name = num2str(t);
299     Name = convertCharsToStrings(Name);
300     BoundaryCircumferencesave = BoundaryCircumference;
301     MaxLengthsave = MaxLength;
302     FlowAccsave = FlowAccsave0;
303 else
304     S = [S;size(SubArea,1)*2^2];
305     Name = [Name;convertCharsToStrings(num2str(t))];
306     BoundaryCircumferencesave = [BoundaryCircumferencesave;BoundaryCircumference];
307     MaxLengthsave = [MaxLengthsave;MaxLength];
308     FlowAccsave = [FlowAccsave;FlowAccsave0];
309 end
310
311 %% Extract Runoff Area
312 for iteration = 1:iterationmax
313     if sum(ExtractSub,'all') < 200 % Discard the area with Flow
314         % Accumulation less than 200
315         break
316     end
317     max1 = max(ExtractSub,[],'all');
318     [row, column] = find(ExtractSub == max1);
319     No = 500;
320     RunoffAreaId = zeros(No,2);
321     for n = 1:No
322         if n == 1
323             x = [row, column];
324             y = FindContour(x,r,c);
325             RunoffArea = zeros(length(y),2);
326         else
327             x = RunoffAreaId;
328             y = FindContour(x,r,c);
329             RunoffArea = zeros(length(y),2);
330         end
331         k = 0;
332         for m = 1:length(y)
333             judge = ExtractSub(y(m,1),y(m,2));
334
335             if judge > Limit
336                 k = k + 1;
337                 RunoffArea(k,:) = y(m,:);
338             end
339         end
340     end
341     RunoffArea(RunoffArea==0) = [];

```

```

342     RunoffArea = reshape(RunoffArea, [], 2);
343     if n == 1
344         RunoffAreaId = [x;RunoffArea];
345     else
346         RunoffAreaId = [RunoffAreaId;RunoffArea];
347         RunoffAreaId = unique(RunoffAreaId, 'rows');
348     end
349 end
350 %% Runoff Area
351 IDmin = min(RunoffAreaId, [], 1);
352 IDmax = max(RunoffAreaId, [], 1);
353 ID(iteration,:) = [IDmin IDmax];
354 Extract = zeros(r,c);
355
356 for l = 1:length(RunoffArea)
357     Extract(RunoffArea(l,1),RunoffArea(l,2)) = ...
358         ExtractSub(RunoffArea(l,1),RunoffArea(l,2));
359 end
360
361 if sum(Extract, 'all') < 10
362     break
363 end
364
365 figure1 = figure(2);
366 colormap(spring);
367 axes1 = axes('Parent',figure1);
368 hold(axes1, 'on');
369 hold on
370 ss1 = surf(axes1,H30, 'Parent',axes1, 'EdgeColor', 'none', 'FaceAlpha', 0);
371 ss2 = surf(axes1,Hplot, 'Parent',axes1, 'EdgeColor', 'none');
372 hold off
373 xlim(axes1, [min(cb)-2 max(cb)+2]);
374 ylim(axes1, [min(rb)-2 max(rb)+2]);
375 % zlim(axes1, [0.5 5000]);
376 grid(axes1, 'on');
377 hold(axes1, 'off');
378 % Set the remaining coordinate area properties
379 set(axes1, 'Color', 'none', 'Colormap', cm, 'DataAspectRatio', [1, 1, 0.5]);
380 view(axes1, [0 -90]);
381 cb1 = colorbar(axes1, 'Position', ...
382     [0.077 0.146862483311081 0.0229612109744559 0.671537516688922]);
383 cb1.Label.String = 'Level';
384 cb1.Label.FontSize = 12;
385 % Create axes
386 axes2 = axes('Parent',figure1);
387 hold(axes2, 'on');
388 % Create surf
389 hold on
390 ss1 = surf(axes2,FlowAccumulation, 'Parent',axes2, 'EdgeColor', 'none', 'FaceAlpha', 0);
391 ss2 = surf(axes2,Extract, 'Parent',axes2, 'EdgeColor', 'none', 'FaceAlpha', 0.8);
392 cb2 = colorbar(axes2, 'Position', ...
393     [0.93355737704918, 0.146862483311081, 0.022961210974456, 0.671537516688921]);
394 cb2.Label.String = 'SQRT of Flow Accumulation';
395 cb2.Label.FontSize = 12;
396 hold off

```

```

397 xlim(axes2, [min(cb)-2 max(cb)+2]);
398 ylim(axes2, [min(rb)-2 max(rb)+2]);
399 zlim(axes2, [0 40]);
400 grid(axes2, 'on');
401 hold(axes2, 'off');
402 set(axes2, 'Color', 'none', 'Colormap', colorhot, ...
403     'DataAspectRatio', [1,1,0.5], 'XTick', [], 'YTick', []);
404 view(axes2, [0 -90]);
405 set(figure1, 'Position', Posi);
406 print(['An example', num2str(t), '-', num2str(iteration)], '-djpeg', '-r600')
407 close all
408 ExtractSub = ExtractSub - Extract;
409
410 %% Surface Line
411 for j = 1:LineNo
412     if sum(Extract, 'all') < 10
413         break
414     end
415     max1 = max(Extract, [], 'all');
416     [row, column] = find(Extract == max1);
417     Extract(row, column) = 0;
418     No = 1200;
419     RunoffId = zeros(No, 2); % indice of surface runoff
420     RunoffId(1,:) = [row, column];
421     for m = 2:No
422         if row-1 == 0 || row+1 == r || column-1 == 0 || column+1 == 0
423             break
424         else
425             ninegrids = Extract(row-1:row+1, column-1:column+1);
426         end
427         ninegrids(2,2) = 0;
428         if m > 2
429             rowlast = RunoffId(m-2,1);
430             columnlast = RunoffId(m-2,2);
431             rowrecent = RunoffId(m-1,1);
432             columnrecent = RunoffId(m-1,2);
433
434             deltax = rowrecent - rowlast;
435             deltay = columnrecent - columnlast;
436
437             if deltax == -1 && deltay == 0 % North
438                 ninegrids(3,:) = 0;
439             elseif deltax == -1 && deltay == 1
440                 ninegrids(2,1) = 0;
441                 ninegrids(3,1) = 0;
442                 ninegrids(3,2) = 0;
443             elseif deltax == 0 && deltay == 1 % East
444                 ninegrids(:,1) = 0;
445             elseif deltax == 1 && deltay == 1
446                 ninegrids(1,1) = 0;
447                 ninegrids(1,2) = 0;
448                 ninegrids(2,1) = 0;
449             elseif deltax == 1 && deltay == 0 % South
450                 ninegrids(1,:) = 0;
451             elseif deltax == 1 && deltay == -1

```

```

452         ninegrids(1,2) = 0;
453         ninegrids(1,3) = 0;
454         ninegrids(2,3) = 0;
455         elseif deltax == 0 && deltax == -1 % i÷ West
456             ninegrids(1,3) = 0;
457         elseif deltax == -1 && deltax == -1
458             ninegrids(3,2) = 0;
459             ninegrids(3,3) = 0;
460             ninegrids(2,3) = 0;
461         end
462     end
463     M = max(ninegrids,[],'all');
464     if M < 1
465         break
466     end
467     [row, column] = find(Extract == M);
468     Extract(row,column) = 0;
469     RunoffId(m,:) = [row column];
470 end
471 RunoffId(RunoffId == 0) = [];
472 RunoffId = reshape(RunoffId,[],2);
473
474 %% The length of runoff line
475 LineLength = 0;
476 for m = 2:size(RunoffId,1)
477     p1 = RunoffId(m-1,:);
478     p2 = RunoffId(m,:);
479     LineLength = LineLength + distanceHHS(p1,p2);
480 end
481 Lengthsave0(1,LineNo*(iteration - 1)+j) = LineLength;
482
483
484
485 %% Runoff Area
486 ExtractLine = zeros(r,c);
487 for k = 1:size(RunoffId,1)
488     ExtractLine(RunoffId(k,1),RunoffId(k,2)) = ...
489         FlowAccFig(RunoffId(k,1),RunoffId(k,2));
490 end
491
492 figure1 = figure(2);
493 colormap(spring);
494 axes1 = axes('Parent',figure1);
495 hold(axes1,'on');
496 hold on
497 ss1 = surf(axes1,H30,'Parent',axes1,'EdgeColor','none','FaceAlpha',0);
498 ss2 = surf(axes1,Hplot,'Parent',axes1,'EdgeColor','none');
499 hold off
500 xlim(axes1,[min(cb)-2 max(cb)+2]);
501 ylim(axes1,[min(rb)-2 max(rb)+2]);
502 zlim(axes1,[0.5 5000]);
503 grid(axes1,'on');
504 hold(axes1,'off');
505 % Set the remaining coordinate area properties
506 set(axes1,'Color','none','Colormap',cm,'DataAspectRatio',[1,1,0.5]);
507 view(axes1,[0 -90]);

```

```

508 % Create colorbar
509 cb1 = colorbar(axes1,'Position',...
510 [0.077 0.146862483311081 0.0229612109744559 0.671537516688922]);
511 cb1.Label.String = 'Level';
512 cb1.Label.FontSize = 12;
513 % Create axes
514 axes2 = axes('Parent',figure1);
515 hold(axes2,'on');
516 % Create surf
517 hold on
518 ss1 = surf(axes2,FlowAccumulation,'Parent',axes2,'EdgeColor','none','FaceAlpha',0);
519 ss2 = surf(axes2,ExtractLine,'Parent',axes2,'EdgeColor','none','FaceAlpha',0.8);
520 cb2 = colorbar(axes2,'Position',...
521 [0.93355737704918,0.146862483311081,0.022961210974456,0.671537516688921]);
522 cb2.Label.String = 'SQRT of Flow Accumulation';
523 cb2.Label.FontSize = 12;
524 hold off
525 title(['Length = ',num2str(Length),' m'])
526 xlim(axes2,[min(cb)-2 max(cb)+2]);
527 ylim(axes2,[min(rb)-2 max(rb)+2]);
528 zlim(axes2,[0 40]);
529 grid(axes2,'on');
530 hold(axes2,'off');
531 set(axes2,'Color','none','Colormap',colorhot,...
532 'DataAspectRatio',[1,1,0.5],'XTick',[],'YTick',[]);
533 view(axes2,[0 -90]);
534 set(figure1,'Position',Posi);
535 print(['An example',num2str(t),'-',num2str(iteration),'-',num2str(j)],'-djpeg','-r600')
536 close all
537 Extract = Extract - ExtractLine;
538
539
540
541 end
542
543
544 end
545 %% Save value of Length
546 Lengthsave0 = sort(Lengthsave0,'descend');
547 if i == 1 && sub == 1
548     Lengthsave = Lengthsave0;
549 else
550     Lengthsave = [Lengthsave;Lengthsave0];
551 end
552
553 end
554
555 end
556 VariableName = ["ID","Flow Accumulation","S","Boundary circumferencesave","MaxLengthsave","Each Length of surface runoff"];
557 MatrixSave = [FlowAccsave';S';Boundarycircumferencesave';MaxLengthsave';Lengthsave'];
558 writematrix(VariableName,ExcelName,'Sheet',1,'Range','B1');
559 writematrix(Name,ExcelName,'Sheet',1,'Range','B2');
560 writematrix(MatrixSave,ExcelName,'Sheet',1,'Range','C2');
561 save('FlowAccsub.mat','FlowAccsub');
562 save('DEMsub.mat','DEMsub');
563 save('TPIsub.mat','TPIsub');

```

```

564   toc
565
566   function y = FindContour(x,r,c)
567   % Note:
568   % The function is used to find the coordinate index of Contour point (?)
569   % surrounding the given inner points (*).
570   %   ? ? ?
571   %   ? * ?
572   %   ? ? * ? ?
573   %   ? * * * ?
574   %   ? ? ? ? ?
575   % USAGES
576   % y = FindContour(x)
577   %
578   % INPUT:
579   % x: The coordinate index of inner points
580   % r: The maximum range of row value
581   % c: The maximum range of column value
582   % OUTPUT:
583   % y: The coordinate index of Contour point surrounding the inner points
584   %% read original data and find size
585   [rold, ~] = size(x);
586
587   %% creat a full matrix to save result data
588   Full = zeros(rold*8,2);
589
590   %% creat a direction matrix
591   direction = [...
592     -1 0;...due north
593     -1 +1;...northeast
594     0 +1;...due east
595     +1 +1;...southeast
596     +1 0;...due south
597     +1 -1;...southwest
598     0 -1;...due west
599     -1 -1];% northwest
600   for i = 1:rold
601     Full(1+(i-1)*8:i*8,:) = x(i,:) + direction;
602   end
603
604   y = unique(Full,'rows');
605
606   [rtest,~] = find(y(:,1) == 0 | y(:,1) == r+1 | y(:,2) == 0 | y(:,2) == c+1);
607   y(rtest,:) = [];
608
609   end
610
611   function d = distanceHHS(p1,p2)
612
613   d = ((p1(1,1) - p2(1,1)).^2 + (p1(1,2) - p2(1,2)).^2).^(1/2);
614   end
615
616   %
617   % function L = maxLength(p)
618   % % Note: Find the maximum length of a series of given points
619   % %
620
621

```

```

622 % % USAGES
623 % % L = maxLength(p)
624 % %
625 % % INPUT:
626 % % p: Inputting a series of given points
627 % % OUTPUT:
628 % % y: Find the maximum length of a series of given points
629 % for i = size(p,1)
630 %
631 %
632 %
633 %
634 % end
635
636
637
638 % function F = PointSort(p)
639 % % Note: Sorting the vertex of a polygon clockwise
640 %
641 % % USAGES
642 % % F = PointSort(p)
643 % %
644 % % INPUT:
645 % % p: Inputting the vertex of a polygon
646 % % OUTPUT:
647 % % y: Sorting the vertex of a polygon as clockwise
648 % centerx = mean(p(:,1));
649 % centery = mean(p(:,2));
650 % p(:,1) = p(:,1) - centerx;
651 % p(:,2) = p(:,2) - centery;
652 % p = [p;p(1,:)]; %
653 % for i = 1:size(p,1)-1
654 %     for j = 1:size(p,1)-i
655 %         crossproduct = det([p(j,1) p(j,2);p(j+1,1) p(j+1,2)]);
656 %         if crossproduct < 0
657 %             p([j,j+1],:) = p([j+1,j],:);
658 %         end
659 %     end
660 % end
661 % p = unique(p,'rows','stable');
662 % F = p;
663 %
664 %
665 % end
666 %
667
668
669
670

```
